# Supplementary material for: Generalization of supermicrosurgery with robotic assistance
Source: Research Square preprint supplement (doi:10.21203/rs.3.rs-8114833/v1), 2025-11-28
Supplement: Supplementary file 1 [file b853cca15a24c712c21fdc7f.docx]

**Supplementary Video 1: Automatic Instrument Exchange**

Practical use of the automatic instrument-exchange function.

**Supplementary Video 2: Rat femoral-artery anastomosis performed by a board-certified plastic surgeon**

Rat femoral-artery anastomosis performed by a board-certified plastic surgeon (A). The diameter of the rat’s femoral artery is 0.6 mm.

**Supplementary Video 3: Participant No.10 learning the basic robotic operations**

Research participant No.10 learning to operate the surgical-assistant robot and performing various tasks, such as peg transfer, threading, ligation, and suture cutting.

**Supplementary Video 4: Simulated blood-vessel anastomosis performed by participant No.9**

Research participant No.9 practicing vascular anastomosis using a simulated blood-vessel model. The diameter of the simulated blood vessel is 1.0 mm.

**Supplementary Video 5: Ventral metacarpal-artery anastomosis performed by participant No.2**

Research participant No.2 practicing vascular anastomosis using the ventral metacarpal artery of a chicken wing. The diameter of the ventral metacarpal artery is 0.8 mm.

**Supplementary Video 6: Rat femoral-artery anastomosis performed by a non-plastic surgeon (participant No.12, a case of patency**

Rat femoral-artery anastomosis performed by research participant No.12 (patent case). The diameter of the rat’s femoral artery is 0.6 mm.

**Supplementary Video 7: Rat femoral-artery anastomosis performed by a non-plastic surgeon (participant No.9, a case of occlusion)**

Rat femoral-artery anastomosis performed by research participant No.9 (occlusion case). The diameter of the rat’s femoral artery is 0.6 mm.

**Supplementary Video 8: One-week postoperative evaluation of blood flow: a case of patency (participant No.12)**

The rat femoral artery anastomosed by research participant No.12 was examined 1 week postoperatively to assess blood-flow patency. This is a case of arterial patency.

**Supplementary Video 9: One-week postoperative evaluation of blood flow: a case of occlusion (participant No.9)**

The rat femoral artery anastomosed by research participant No.9 was examined 1 week postoperatively to assess blood-flow patency. This is a case of arterial occlusion.
